# Supplementary material
Source: ML conference proceedings conference paper supplement (https://openreview.net/forum?id=PdRf0O7baQ)

# Few-shot Scaling

Success Rate (%)

Fridge

Hammer

Scissors

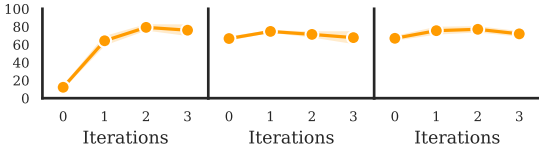

Supplement: supplementary_material [file fewshot_scaling.pdf › grasp-vlm2/vis/fewshot_scaling.pdf]

Success Rate (%)

Pre-recorded   Ours (Zero-Shot)   Ours (Few-Shot)   Oracle

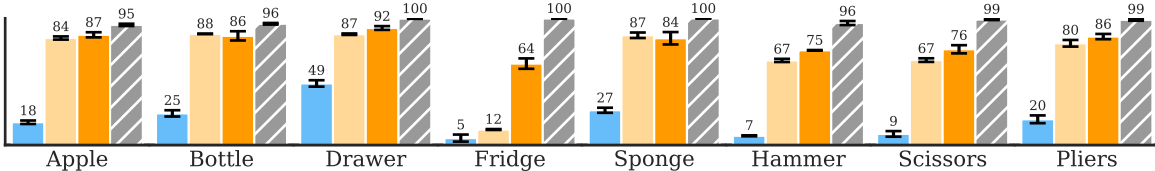

Supplement: supplementary_material [file method_comparison.pdf › grasp-vlm2/vis/method_comparison.pdf]

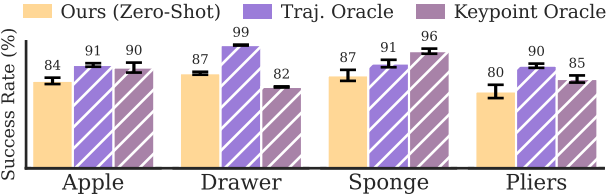

Supplement: supplementary_material [file oracle_comparison.pdf › grasp-vlm2/vis/oracle_comparison.pdf]

# Trajectory Distribution Across Iterations

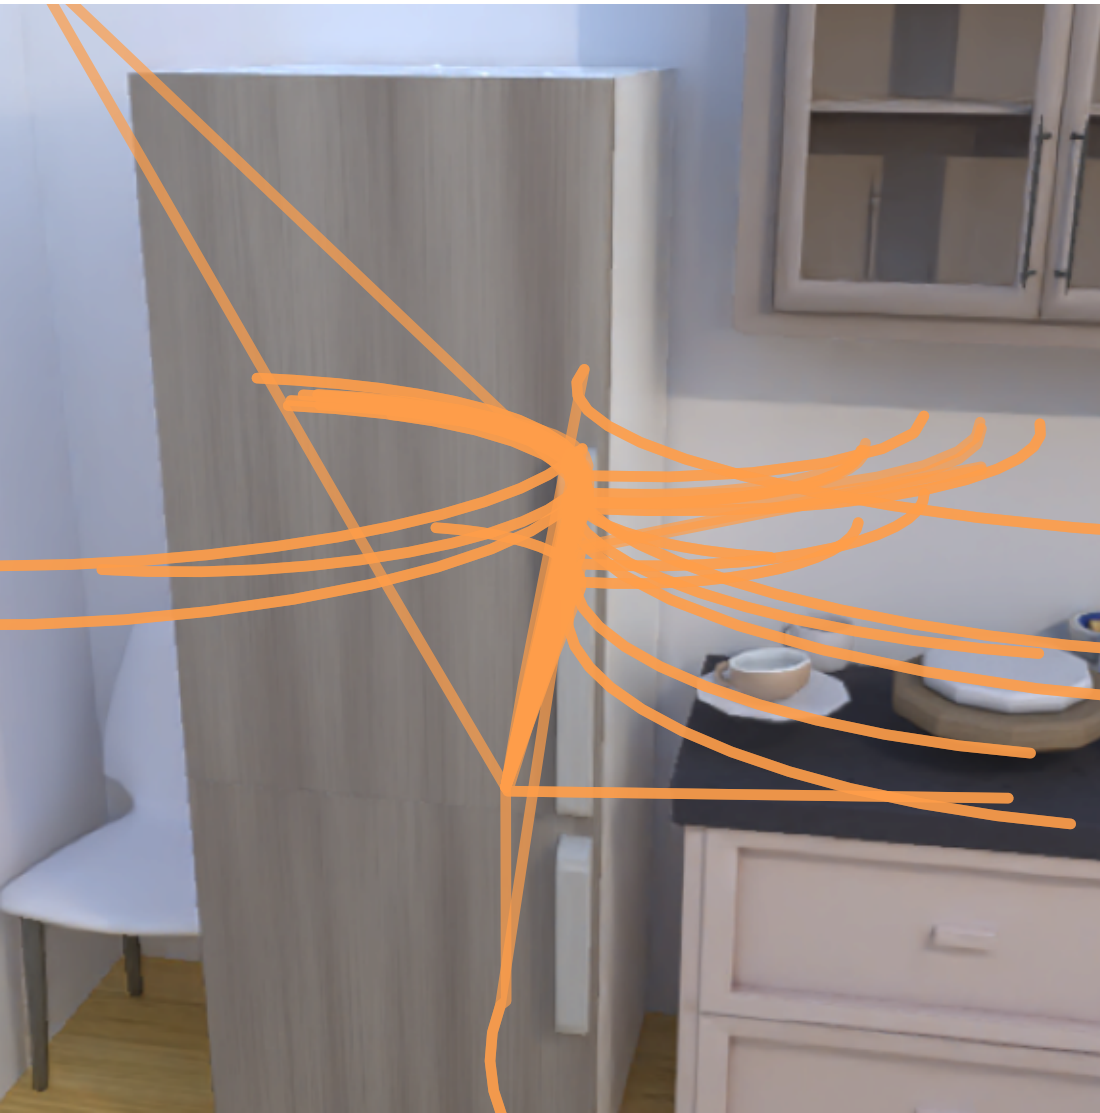

Iteration 0

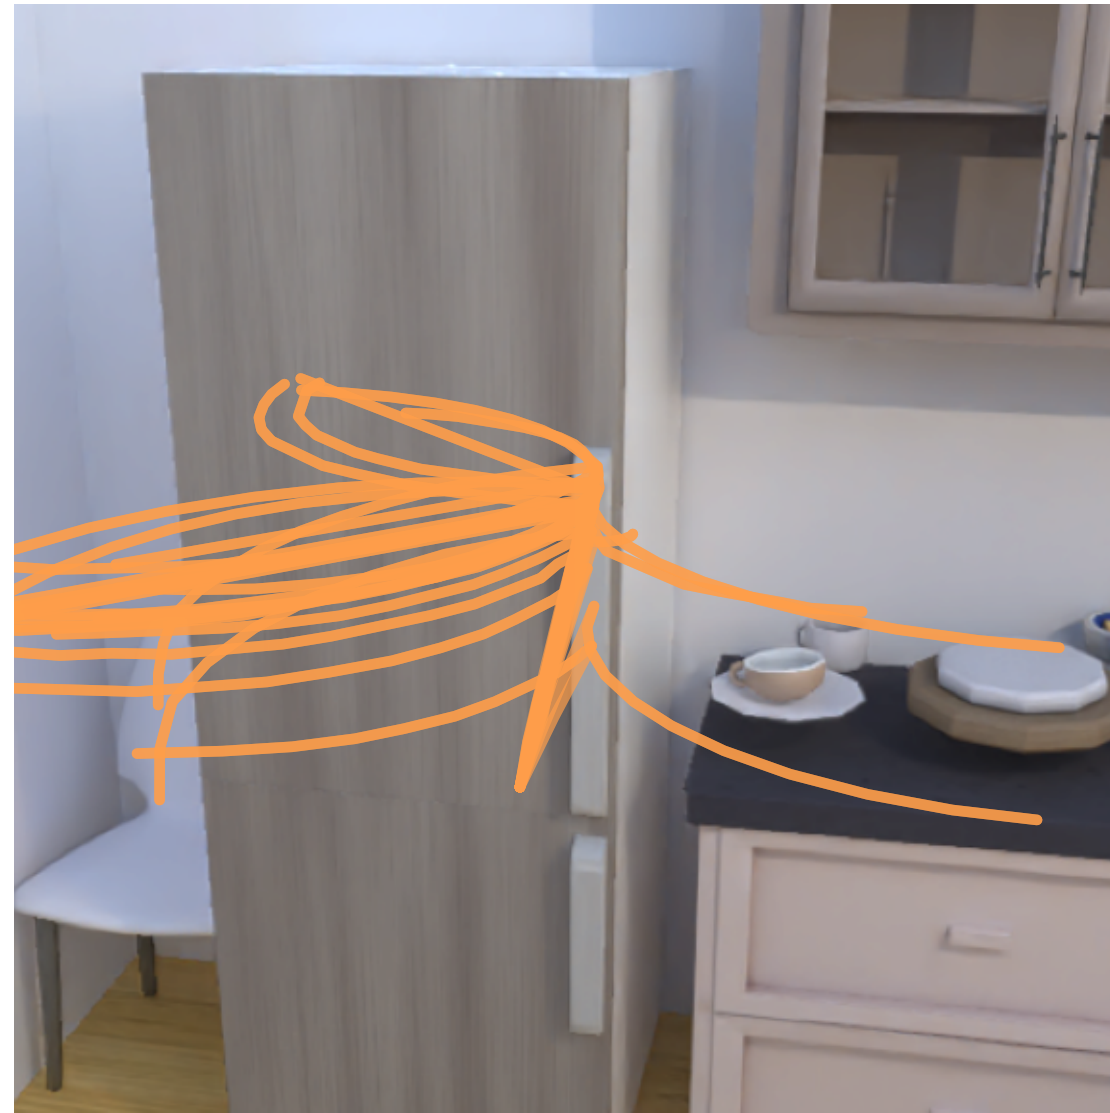

Iteration 1

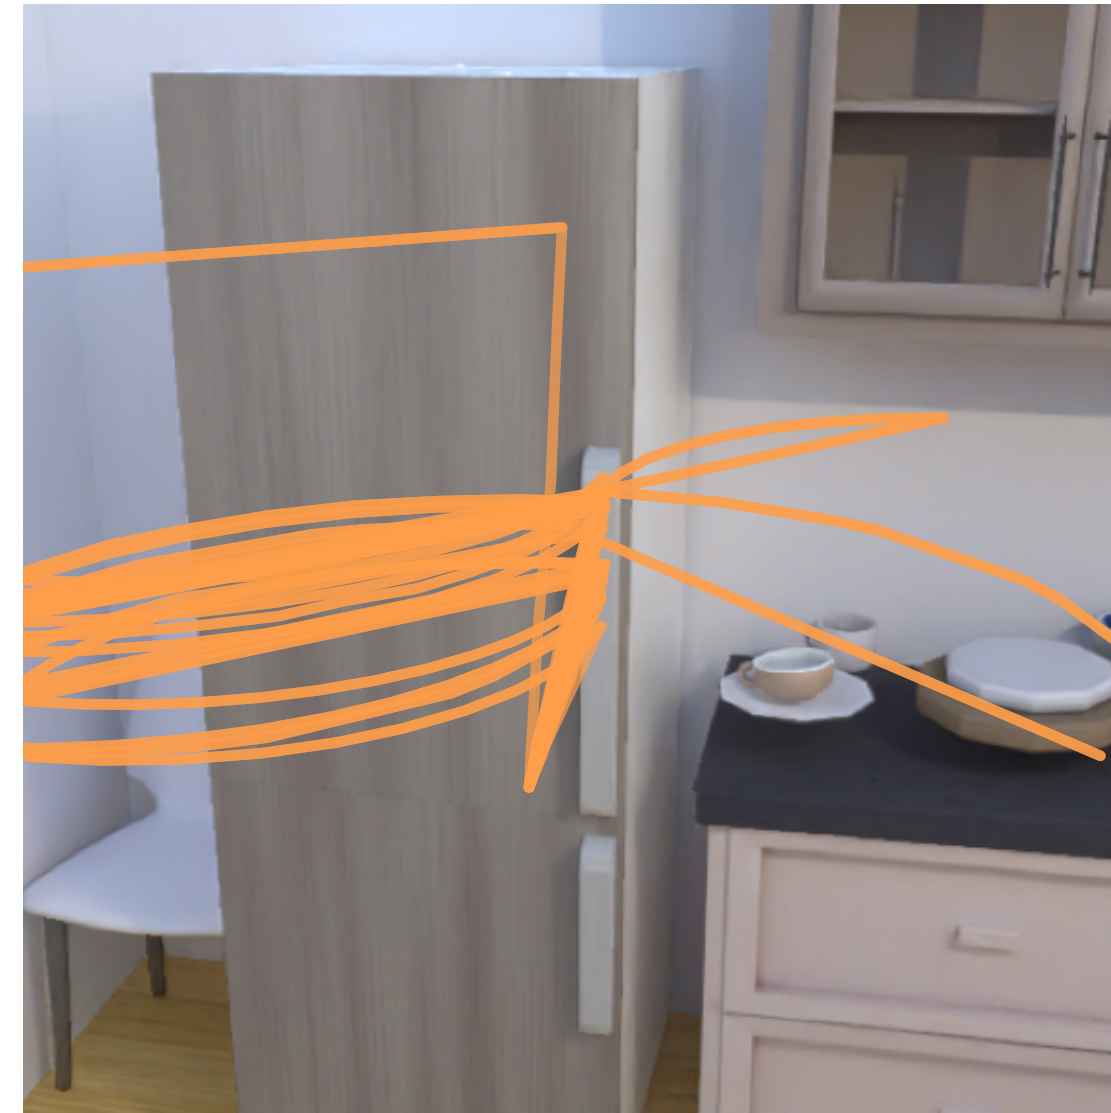

Iteration 2

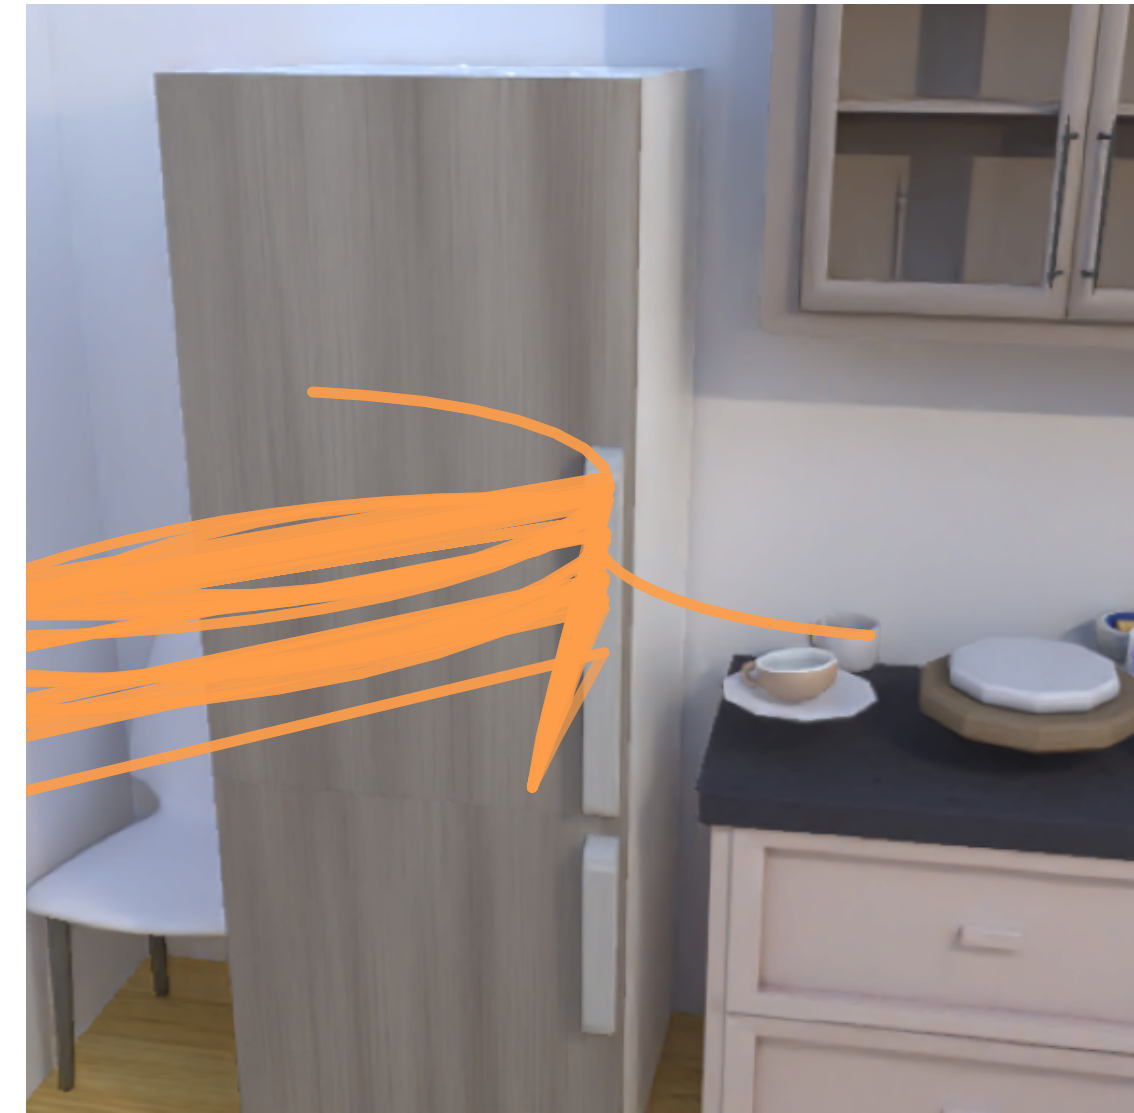

Iteration 3

Supplement: supplementary_material [file trajectories_comparison.pdf › grasp-vlm2/vis/trajectories_comparison.pdf]

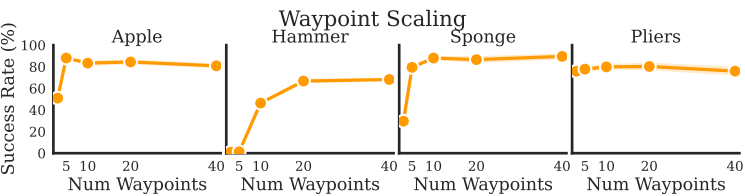

Supplement: supplementary_material [file waypoint_scaling.pdf › grasp-vlm2/vis/waypoint_scaling.pdf]
